## **Stimulation-artifact-free, high-spatiotemporal-resolution *in vivo* opto-electrophysiology with $\mu$ LED optoelectrodes**

Kanghwan Kim, Mihály Vöröslakos, John P. Seymour, Kensall D. Wise, György Buzsáki, and Euisik Yoon

### **Abstract**

*In vivo* extracellular electrophysiology and genetic-engineering-assisted optical stimulation combined (*in vivo* opto-electrophysiology or optoEphys) has proven its great potential to be one of the best tools for study of the intricate networks inside the brain. Micro-LED optoelectrode, the Michigan Probe with monolithically integrated cell-sized LEDs, enabled *in vivo* optoEphys at the highest spatial resolution to date. However, high-magnitude stimulation artifact had prevented experiments from being conducted at a desirably high temporal resolution. Here, we report engineering schemes with which the magnitude of stimulation artifact generated from  $\mu$ LED optoelectrode can be greatly reduced for nearly artifact-free ( $V_{\text{peak-to-peak}} < 50 \mu\text{V}$ ) *in vivo* experiments. The second-generation  $\mu$ LED optoelectrodes, fabricated using heavily boron-doped silicon wafer and equipped with dedicated EMI shielding layers, exhibited capability to record neuronal activities during fast-switched optical stimulations without degradation in signal quality. We believe that the novel  $\mu$ LED optoelectrodes will lead to exciting discoveries of the brain's circuit-level mechanisms.

### **Introduction**

Neurons talk with one another using electric pulses. While neuronal communication involves change in the electric potential inside the cell body, since neurons are suspended in highly conductive media, observation of the change in the electric field from locations outside of the cell provides sufficient information about the communication taking place among the cells [Henze2000].

Characterization of such communication; including the wiring pattern, intensity of the connection, time-

domain correlation between two communicating neurons' firing pattern, etc; inside a volume of tissue in which a number of neurons are densely populated requires multiple recording electrodes to be located in vicinity of one another so that activities of multiple neurons can be simultaneously recorded [Buzsaki 2004].

Analysis of a complicated system, such as a network of densely populated neurons inside a part of a brain, requires capabilities not only to accurately monitor the system's activity as a whole but also to precisely modulate the system's activity at specific locations. Among many techniques that allow modulation of neuronal activities, optogenetics has become the most widely adopted technique thanks to its advantages over the other techniques: cell type specificity and high temporal resolution [Boyden 2005] [Deisseroth 2011]. The combination of genetic engineering-assisted optical stimulation and high-resolution electrical recording of neuronal activities, here termed opto-electrophysiology (optoEphys), has proven to be one of the best tools for study of the intricate networks inside the brain [Buzsaki 2015].

Neuroscientists and engineers together have developed a number of tools that can provide the very capability to electrically record the activity of a set of neurons at high spatial resolution while optically stimulating a portion of the neurons. Implantable silicon multi-electrode arrays, or Michigan probes [Wise 1975] [Wise 2008], has been one of the best candidates to provide the capability thanks to its planar profile and standardized fabrication process. A number of devices that took advantage of the Michigan probe platform had been developed and utilized for interesting neuroscience discoveries [Royer 2010] [Stark 2012] [Wu 2013] [Wu 2015] [Kampasi 2016] [Schwaerzle 2017]. Among those is micro-LED ( $\mu$ LED) optoelectrode, the Michigan probe with monolithically integrated cell-sized LEDs for optical stimulation [Wu 2015], shown in Fig. 1a and 1b. This device, thanks to the small size of the light source and the small profile of the device, enabled *in vivo* optical stimulation of neurons in the brains of moving animals at the highest spatial resolution reported to date, combined with simultaneous

recording of activities of the very neurons that are under the influence of the optical stimulation. A number of interesting discoveries have been made since inception of device [Wu 2015] [English 2017].

While being considered very promising,  $\mu$ LED optoelectrode had not been utilized at its full capacity; the optoelectrode was not able to provide stimulating and recording capacities both at high spatiotemporal resolutions, due to existence of high-magnitude stimulation artifact in the recorded signal during optical stimulation [Wu 2015] [Kim 2016]. While the recording channels were supposed to pick up only the neuronal activities in the vicinity of the recording electrodes, signals that resemble the signal provided to the LEDs for optical stimulation showed up on the recorded signals. Because of existence of the stimulation artifact, either the optical stimulation had to be limited to slowly-changing low-frequency signal [Wu 2015], or the signals collected within a few milliseconds around the beginning and the ending of pulsed optical stimulation had to be discarded from the recorded neural data [English 2017]. Because both of these measures prevent application of fast-switching pulsed optical stimulation, the temporal resolution of the stimulation had been limited to at most a couple of tens to hundreds of hertz. The limited temporal resolution of stimulation in turn prevented use of the  $\mu$ LED optoelectrodes in wider applications in which high temporal resolution is required, for example in closed-loop experimental setups in which the stimulation is required to be applied right after detection of a certain activity in the recorded neural signal [Grosenick 2015].

A variety of forms of optical-stimulation-induced artifact on signals recorded *in vivo* using electrode arrays have been reported in the literature [Wise 1970] [Royer 2010] [Mikulovic 2016] [Jun 2017] [Kim 2016] [Kampasi 2016] [Kampasi 2018] [Ayling 2009] [Han 2009] [Cardin 2010], [Khurram 2013] [Laxpati 2014] [Budai 2018]. Among them is artifact due to photoelectrochemical effect (PEC), which is emission of electrons from the surface of metal at the metal-electrolyte interface. Because it takes place when a metal electrode is exposed to incident photons with sufficient energy, PEC has been observed in a variety of devices regardless of the substrate material [Ayling 2009] [Han 2009] [Cardin

2010], [Khurram 2013] [Laxpati 2014] [Budai 2018]. Another form of stimulation artifact is that resulting from electromagnetic interference (EMI), a phenomenon that takes place due to exchange of electrical and magnetic energy between two adjacent conductive materials that carry electricity via capacitive and inductive coupling. Because EMI takes place when the source (or the aggressor) is in close proximity to the target (or the victim), it has been observed on a device that have light sources directly integrated on the recording device itself [Kim 2016] [Kampasi 2018]. Finally, artifact that was induced by photovoltaic (PV) effect, during which the electrostatic potential of the semiconductor substrate changes due to illumination by photons with sufficient energy, has been observed. Because most high-density *in vivo* extracellular electrode arrays have been made using silicon substrate, the artifact was observed in many experiments in which visible light ( $\lambda < 1100$  nm) was used [Mikulovic 2016] [Jun 2017]. A variety of engineering measures has taken place to prevent the artifact from arising, including replacement of metal electrodes with transparent electrodes [Kuzum 2014], [Park 2016], inclusion of EMI shielding structures [Kim 2016] [Kampasi 2018], and degenerate doping of the silicon substrate [Wise 1970] [Scholvin 2016]. Unfortunately, because the  $\mu$ LED optoelectrodes is made up of heterogeneous materials that are highly densely integrated within a small footprint, neither had the sources of the artifact in  $\mu$ LED optoelectrodes been clearly identified nor had the solutions for elimination of these artifact been suggested yet.

We identified the sources of stimulation artifact on the  $\mu$ LED optoelectrode and successfully reduced the stimulation artifact to be less than 50  $\mu$ V peak-to-peak (pp) on all the recording channels during pulsed optical stimulation *in vitro*. The sources of stimulation artifact include EMI from LED driving signal (Fig. 1c) and PV-induced electrostatic potential from illumination on the silicon substrate (Fig. 1d). PEC-induced stimulation artifact, on the other hand, turned out to be insignificant on  $\mu$ LED optoelectrodes because the amount of photons that are incident on metal-electrolyte interface is negligible. We studied the mechanisms by which the components of the artifact are generated and

successfully reduced the effect by implementing engineering schemes. The second-generation  $\mu$ LED optoelectrode (Fig. 1f) fabricated with both EMI- and PV- reduction schemes (Figs. 1g and 1h, respectively) achieved reduction of stimulation artifact magnitude to nearly zero on most of the recording channels (Fig. 1i), and lower than 50  $\mu$ Vpp on all the recording channels with additional pulse slew rate modification. By validating that stimulation artifact can be successfully eliminated *in vivo*, we provide evidence that the  $\mu$ LED optoelectrodes are capable of truly high-spatiotemporal-resolution *in vivo* optoEphys.

## Results

### Reduction of EMI-induced artifact with shielding

EMI is inevitable in a system where the aggressor and the victim are located in close proximity to each other. On  $\mu$ LED optoelectrode, as shown in Fig. 2a and Fig. 2b, metal traces that carry signals of different power levels are integrated at high density in order to minimize the width and therefore the cross-sectional area of the implanted portion of the device. The signal recording circuitry, especially the metal traces (interconnects) that connect the recording electrodes and backend of the electrode, is integrated adjacent to the LED driving circuitry. The high density integration increases mutual capacitance between the traces (Fig. 2b), and in turn makes the electrode circuitry susceptible to EMI resulting from LED driving.

We built models of  $\mu$ LED optoelectrode shanks and calculated mutual capacitances between the interconnects (Fig. 2c, top). Because n-type gallium nitride (n-GaN) layer underneath the interconnect is also a part of the LED driving circuitry and its electrostatic potential changes as a function of the LED forward bias voltage, the layer was also taken into account as an electrode in the model. The capacitance between an LED interconnect and a recording electrode interconnect that are the closest with each other was calculated to be  $5.37 \times 10^{-19}$  F  $\mu\text{m}^{-1}$ , and that between the n-GaN layer and one

recording electrode interconnect was  $2.3 \times 10^{-16} \text{ F } \mu\text{m}^{-1}$ . If all the interconnects are assumed to be floating at both ends, capacitive voltage coupling between the LED interconnects and the recording electrode interconnect can be as high as -48.96 dB (3.57 mV coupling for 1 V LED voltage), and the coupling between the n-GaN layer and the recording electrode interconnects can be as high as -0.06 dB (0.99 mV coupling for 1 mV n-GaN voltage). The voltage distribution inside the optoelectrode (and the air surrounding the optoelectrode) is shown in Fig. 2c (bottom).

In order to effectively reduce capacitive coupling between the LED interconnects and the recording electrode interconnects, the LED interconnects and the recording electrode interconnects were placed into two layers which are separated from each other by a ground-connected metal layer, or the shielding layer, in between (Fig. 2d, top). In order to prevent coupling from the n-GaN layer, the recording electrode interconnects were placed as far as they can be from the edge of the shielding layer directly outside of which the n-GaN is exposed. Electrostatic simulation of the model expected the coupling between the LED interconnect and the recording interconnects and the coupling between the n-GaN layer and the recording interconnects to be reduced by greater than 46 orders of magnitude (to approximately -975 dB) and 8 orders of magnitude (to approximately -60 dB), respectively (Fig. 2d, bottom).

We fabricated  $\mu\text{LED}$  optoelectrodes with the shielding layer, recorded stimulation artifact resulting from turning on and off  $\mu\text{LEDs}$  *in vitro*, and compared the artifact with that recorded on  $\mu\text{LED}$  optoelectrodes without the shielding structure (the 1<sup>st</sup>-generation  $\mu\text{LED}$  optoelectrodes). Peak-to-peak magnitude of the transient artifact with different optical powers and the averaged wideband and high-pass filtered waveforms of the artifact resulting from optical stimulation are shown in Fig. 3. On the 1<sup>st</sup>-generation  $\mu\text{LED}$  optoelectrodes, stimulation artifact with high transient magnitude ( $> 1 \text{ mVpp}$ ) showed up on most recording sites regardless of the amount of optical power generated from the  $\mu\text{LEDs}$  (Fig. 3b). Shape of the wideband (Fig. 3c, left) signals of the stimulation artifact, which resemble the shape

and the phase of the input voltage signal, suggested strong EMI-induced artifact. The magnitude of the transient stimulation artifact on the shielded  $\mu$ LED optoelectrodes, on the other hand, was consistently less than 1mVpp for each irradiance, even though it increased with increased amount of generated light (Fig. 3e). It is clear from both the wideband (Fig. 3f, left) and the high-pass filtered traces (Fig. 3f, right) that most EMI-induced artifact, characterized by large-magnitude transient peaking with positive polarity and slow decay, has been greatly reduced. Great reduction of the stimulation artifact with shielding was observed at all irradiance tested (Fig. 3g). At 50 mW mm<sup>-2</sup> irradiance, where the magnitude of the artifact recorded from the shielded device was largest, 5.22-fold reduction of the stimulation artifact (mean  $\pm$  SD from 2477.75  $\pm$  1733.83 to 474.59  $\pm$  146.26  $\mu$ Vpp) was observed.

### **Reduction of PV-induced artifact with high-density substrate doping**

Although the artifact resulting from EMI was greatly reduced with inclusion of shielding layer, the magnitude of the residual artifact was still greater than that of typical spikes ( $\sim$  100  $\mu$ Vpp). Interestingly, the polarity of the stimulation artifact observed right after the beginning and the ending of the LED driving pulses within a few seconds, or the transient artifact, observed from most of the electrodes on the shielded  $\mu$ LED optoelectrodes became inverted with shielding. As can be seen in Fig. 3c, the transient artifact seen on the 1<sup>st</sup> generation  $\mu$ LED optoelectrodes had the same positive polarity with the LED driving signal, forming an inverted-'v' (or '^') shaped waveform. However, on the shielded  $\mu$ LED optoelectrodes, (Fig. 3f and h) the polarity of the transient artifact was inverted, making the waveform v-shaped. Inversion of the polarity of the transient artifact suggests that the residual artifact could result from a different source other than EMI, which most likely is coupled through a path that is different from the path through which EMI-induced artifact is coupled.

We exposed the tips of the optoelectrode to focused LED light with wavelength profile similar to that of the light generated from the  $\mu$ LEDs ( $\lambda_{\text{peak}} \cong$  470 nm) and confirmed that the polarity of the

artifact observed on the shielded  $\mu$ LED optoelectrodes is identical to that of the voltage signal that is induced on the signal recorded from the electrodes on upon illumination (Supplementary Figure 2). We further verified that, by repeating the experiment with electrode array structures fabricated on GaN-on-sapphire GaN/InGaN LED substrate and soda lime glass substrate, the effect is due to neither PEC nor PV-induced electrostatic potential on GaN layer, but exclusively from a phenomenon taking place inside the silicon substrate (Supplementary Figure 3).

We built a 3D model of a  $\mu$ LED optoelectrode shank and simulated the effect of illumination on the silicon substrate (Fig. 4a). Doping density of boron, an acceptor dopant, inside the silicon substrate and the intensity of the optical illumination were varied. We observed a series of phenomena that results in buildup of electrostatic potential at the substrate-electrolyte interface and in turn generation of a voltage pulse with negative polarity in the recorded signal (Fig 4b). First, optical illumination induces electron-hole pair generation inside the silicon substrate, and the optically generated carriers redistribute inside the substrate separately depending on the type. Difference between electron and hole distribution patterns gives rise to electric field inside the substrate, and, in turn, the electrostatic potential of the substrate-electrolyte interface changes. Because the electrolyte is connected to the common reference pin of the amplifier chip which is then connected to the inverting inputs of the low-noise amplifiers in the IC, the resulting output waveform has a negative polarity.

Figure 4c shows expected substrate-electrolyte interface electrostatic potential (voltage) for substrates with different doping densities under illumination with different intensities. It is worth noting that, while higher doping density results in lower voltage at lower irradiance, with higher irradiance, the voltage on lightly doped (typically referred to as p<sup>-</sup>) substrate becomes higher than that on substrate that is almost intrinsic (not doped, typically referred to as HR or FZ, especially if the silicon substrate was float-zone grown for high-purity and low doping density). As can be seen in Fig. 3d, it was calculated that the interface voltage from a substrate with boron doping density of  $5 \times 10^{16} \text{ cm}^{-3}$  (later referred to as p<sup>-</sup>



substrate) can be as high as that from the substrate with boron doping density of  $4 \times 10^{12} \text{ cm}^{-3}$  (later referred to as FZ substrate) under illumination with irradiance as high as  $50 \text{ mW mm}^{-2}$ . On the other hand, the interface voltage from the substrate with boron doping density of  $1 \times 10^{20} \text{ cm}^{-3}$  (later referred to as  $p^+$  substrate) was kept relatively low even with high intensity illumination.

We fabricated shielded  $\mu\text{LED}$  optoelectrodes using GaN-on-Si GaN/InGaN LED wafers with three different boron doping densities and measured the stimulation artifact resulting from  $\mu\text{LED}$  driving at different intensities. It was first confirmed that there is no significant difference in the electrical and optical characteristics among the  $\mu\text{LED}$ s that were fabricated on wafers with different doping densities (Supplementary Figure 4). As shown in Fig. 5a, the magnitude of the stimulation artifact measured from electrodes on shielded  $\mu\text{LED}$  optoelectrodes fabricated using LED wafers with FZ silicon substrate and  $p^-$  silicon substrate significantly increased with increased irradiance ( $109.59 \pm 80.61 \text{ } \mu\text{Vpp}$  at  $1 \text{ mW mm}^{-2}$  to  $569.33 \pm 129.00 \text{ } \mu\text{Vpp}$  at  $50 \text{ mW mm}^{-2}$  and  $99.25 \pm 116.01 \text{ } \mu\text{Vpp}$  at  $1 \text{ mW mm}^{-2}$  to  $474.59 \pm 146.26 \text{ } \mu\text{Vpp}$  at  $50 \text{ mW mm}^{-2}$ , mean  $\pm$  SD, respectively), whereas that from electrodes on shielded  $\mu\text{LED}$  optoelectrodes fabricated using LED wafer with  $p^+$  silicon substrate did not ( $133.04 \pm 121.99 \text{ } \mu\text{Vpp}$  at  $1 \text{ mW mm}^{-2}$  to  $146.05 \pm 143.4 \text{ } \mu\text{Vpp}$  at  $50 \text{ mW mm}^{-2}$ ). The change in the magnitude of the stimulation artifact as the function of the irradiance and the substrate doping density (Fig. 5b) was similar to that expected from FEM simulation, shown in Fig. 4d. The average waveforms of the stimulation artifact measured from all the channels that correspond to the electrodes on the tip on which a  $\mu\text{LED}$  was turned on are shown in Fig. 5c. It can be seen that, even during LED stimulation resulting in the highest intensity (with irradiance of  $50 \text{ mW mm}^{-2}$  at the surface of the  $\mu\text{LED}$ ), the magnitude of the stimulation artifact was lower than  $200 \text{ } \mu\text{Vpp}$ , suggesting that PV-induced stimulation artifact has been greatly reduced with heavy doping of the silicon substrate with boron.

### **Reduction of residual EMI-induced artifact with slew rate modification**

We identified that both implementation of shielding layer and high-density boron doping of silicon substrate greatly reduce the magnitude of the stimulation artifact (Fig. 6). The magnitude of the artifact resulting from  $50 \text{ mW mm}^{-2}$  stimulation was reduced by a factor of 5.22 (from  $2477.75 \pm 1733.83$  to  $474.59 \pm 146.26 \text{ } \mu\text{Vpp}$ , mean  $\pm$  SD) in average with shielding only, and by a factor of 16.97 (to  $146.05 \pm 143.40 \text{ } \mu\text{Vpp}$ , mean  $\pm$  SD) in average with combination of both techniques. However, the magnitude of the stimulation artifact recorded from many recording channels was still comparable to those of typical spikes, which is at most as large as 200 - 300  $\mu\text{Vpp}$ . The artifact has to be reduced so that its maximum magnitude is less than the threshold voltage for spike detection, whose typical value is 50  $\mu\text{Vpp}$  inside a brain.

Analysis of waveforms of the signals recorded from recording channels that correspond to electrodes at different locations provided better understanding of the mechanism by which the residual artifact is generated. Figure 7b shows the magnitude of the stimulation artifact recorded from the channels that correspond to the electrodes on different locations on the tips of the shielded  $\mu\text{LED}$  optoelectrode whose locations are shown in Fig. 7a. Waveform of the stimulation artifact from each channel is presented in Fig. 7c. Close observation of the pattern of the stimulation artifact on each channel reveals that, as can be expected from the mechanism by which it is generated, the PV-induced stimulation artifact, which is characterized by the negative polarity or the 'v'-shape of the transient component, is observed from all the channels with similar magnitude regardless of the location of the electrode. Observation of the difference in the magnitude of the PV-induced stimulation artifact further confirms that the PV-induced stimulation artifact has been eliminated on the shielded  $\mu\text{LED}$  optoelectrodes fabricated using LED wafer with  $\text{p}^+$  silicon substrate. On the other hand, there is a component of the stimulation artifact which has positive polarity (inverted-'v'- or '^'-shaped) and whose magnitude decreases as the distance between the interconnect for the electrode and the  $\mu\text{LED}$  exposed at the center of the shank (through an optical window on the shielding layer) increases (Fig. 7d, e). The

polarity and the distance dependence of the stimulation artifact components suggests that this artifact, which is the only residual artifact that can be observed on shielded  $\mu$ LED optoelectrodes fabricated using LED wafer with  $p^+$  silicon substrate, is EMI-induced artifact originating from the  $\mu$ LED that is exposed through an optical window on the shielding layer.

Because the magnitude of the residual EMI-induced artifact decreases as the function of the distance of the interconnect from the exposed  $\mu$ LED, it might be possible to reduce the artifact by increasing the average distance between the  $\mu$ LEDs and the interconnects. However, because it is important that the size of the  $\mu$ LED optoelectrode is kept minimal in order to prevent damage induced to the brain tissue, it might not be optimal to move the interconnects away from the LEDs at the cost of larger cross-sectional area. Because it is not a viable option to further modify the optoelectrode structure to prevent EMI, we decided to manipulate LED driving voltage waveform to reduce the residual EMI. The slew rate, the rate at which the voltage changes when the voltage transitions from a low level (off) to a high level (on), of the pulse was modified by changing the rise time (as well as the fall time) of the pulse and changing the low-level voltage. Because LED neither flows significant current nor starts to generate light when biased at voltage lower than the turn on voltage, the low-level voltage can be set as high as 2.8 V. Because change in the rise time affects the frequency from which the higher-order harmonics of the stimulation signal decreases at -40 dB/decade (Supplementary Figure 5), rise time greater than the inverse of the signal recording amplifier's sampling angular frequency ( $1 / 2\pi F_s$ ) would reduce the magnitude of the artifact.

Figure 8 shows the mean peak-to-peak magnitude and the waveforms of the stimulation artifact recorded from channels corresponding to the bottom two electrodes on the tips of shielded  $\mu$ LED optoelectrodes (Fig. 8a), which showed residual EMI-induced artifact with the largest magnitude (Fig. 7e). As expected, rise time longer than 100  $\mu$ s (0 - 100 % rise time of 125  $\mu$ s) reduced the magnitude of recorded stimulation artifact, resulting in artifact magnitude smaller than 200  $\mu$ Vpp with as long as 1 ms

of rise time. Further reduction of artifact magnitude with change of the LED driving signal's low-level voltage level to 2.8 V was confirmed, which effectively further reduced the slew rate. With 1-ms long rise time and 2.8-V low-level voltage, the mean artifact magnitude was 46.53  $\mu\text{Vpp}$ , which can be considered artifact-free for applications in which 100  $\mu\text{Vpp}$  is used as the spike detection threshold.

### **Demonstration of artifact-free *in vivo* optoEphys**

We validated successful elimination of stimulation artifact from the  $\mu\text{LED}$  optoelectrode with inclusion of shielding layer, high-density boron doping of the silicon substrate and slew rate modification *in vivo*. A shielded  $\mu\text{LED}$  optoelectrode fabricated using LED wafer with  $\text{p}^+$  silicon substrate was implanted into a brain of a mouse and lowered so that its tips are located in the CA1 region of the hippocampus (Fig. 9a). Once spontaneous spikes and the characteristic high-frequency oscillations (ripples) were detected from electrodes on a shank, each LED on the shank was turned on with varying intensities to identify the optical intensity of optical stimulation to alter the ongoing single unit activity ('localized effect') but not elicit high-frequency oscillations due to synchronized firing of multiple cells ('network effect' similar to seizure). Considering typical duration of an action potential (2 - 3 ms), we used rise time of 1 ms to ensure maximum reduction of the stimulation artifact without great reduction in the temporal resolution of the optical stimulation. Mean stimulation artifact recorded from the channels corresponding to the electrode located on the tip was characterized.

With optical stimulation resulting in  $2 \text{ mW mm}^{-2}$  that induced strong light induced response in many cells, the mean magnitude of the average stimulation recorded from channels corresponding to all the electrode was less than 50  $\mu\text{Vpp}$ , as shown in Fig. 9c, with maximum magnitude of 42.02  $\mu\text{Vpp}$  on Site 2. Optical stimulation with higher intensity induced seizure-like firing of multiple cells inside the region and prevented analysis of stimulation artifact. After characterization of stimulation artifact resulting from driving of each LED, all the three LEDs on the shank were turned on with a predefined

pattern so that there is a short period during which one LED is turning off, another LED is kept on, and the other LED is turning on (highlighted with a rectangle with black dashed sides in Fig. 9d). As shown in Fig. 9d, the series of optical stimulation with the predefined pattern did not induce any significant stimulation artifact that would prevent either online detection of spikes with naked eyes or offline spike sorting. With offline spike sorting [Pachitariu 2016], we identified 6 putative single units (all putative pyramidal neurons) that have distinctive spike waveform in the vicinity of the shank on which the  $\mu$ LEDs were turned on. Further analysis of the processed data identified a putative pyramidal neuron whose spikes occurred in the period during which LED 1 and LED 3 were being toggled, as shown in Fig. 9f. As can be seen in Fig. 9g, no noticeable distortion of the spike waveform due to the stimulation artifact was observed, ensuring that the stimulation was artifact-free.

## Discussion

The amount of reduction of the magnitude of the stimulation artifact achieved with implementation of EMI shielding layer was not as great as the amount of the reduction in the electric field density FEM ES simulation expected. A number of non-idealities in the fabricated  $\mu$ LED optoelectrodes might be responsible for the discrepancy. Firstly, existence of current paths to the ground of recording system through the recording electrodes, shown in Supplementary Figure 1, could have made the shielding layer less effective. Because the impedance of the current path through the recording electrode is lower than that of the path through the input capacitor of the neural signal amplifier, actual magnitude of the EMI-induced stimulation artifact would be greatly smaller than the magnitude of the electric field density the simulation expect. Because the effect of an added shielding layer is similar to that of smaller input impedance of the neural signal amplifier, the lower the impedance of the recording electrode were, the less effective the shielding layer would have been. The shielding layer, on the other hand, might have been less effective than ideal ground-connected shielding

layer due to non-zero resistance of the metal it is made of. The voltage of the shielding layer, especially near the tips of the shanks of the optoelectrode, is not strictly held at zero due to resistive voltage drop through the shank of the optoelectrode. Because the voltage of the shielding layer fluctuates as the voltage of the LED driving interconnect changes, the shielding layer itself could have acted as an EMI source.

While it is possible to reduce the magnitude of stimulation artifact to become lower than detectable level with slew rate modification, in applications that require fast optical stimulation whose bandwidth is larger than 1 kHz, it might be not optimal that pulses with rise and fall times as long as 1 ms are used. While it might not be a practical solution to modify the optoelectrode structure to further reduce the stimulation artifact, modification of the recording electrode material that would result in lower electrode impedance could potentially help reduce the EMI-induced stimulation artifact. While the relationship between the electrode impedance and the magnitude of the stimulation artifact was not obvious in data recorded using fabricated  $\mu$ LED optoelectrodes due to small variance of the electrodes' impedance magnitude (Supplementary Figure 6), the circuit model of the optoelectrode suggests that the magnitude of EMI-induced voltage would be lower with lower electrode impedances due to voltage division across the electrode impedance (Supplementary Figure 1). Some post-fabrication techniques such as site-level electrodeposition of conductive nanoparticles such as Pt nanoparticle [Whalen 2005] [Desai 2010] and PEDOT:PSS [Xiao 2004] [Venkatraman 2011] [Boehler 2017] could be utilized to reduce the magnitude of the electrode impedance by a couple of factors and result in consequent reduction of EMI-induced stimulation artifact.

In some applications, it might be more desirable that LEDs are driven with current pulses than with voltage pulses. Current-based LED drivers are more accessible than the voltage-based drivers, thanks to the easiness of design and implementation using CMOS technology. LED driving of the  $\mu$ LEDs on the  $\mu$ LED optoelectrodes can be thought of LED driving of the  $\mu$ LEDs with voltage pulses with levels that correspond to the current command that is provided to the LED driver. Because of small yet non-

zero leakage current from the current driver, the off-level voltage of the LED driving signal would be non-zero, typically just below the LED turn-on voltage. Therefore, driving the LEDs with rectangular current pulses results in generation of the stimulation artifact whose magnitude is similar to that due to driving of the LEDs with rectangular voltage pulses with non-zero low-level voltage. Driving the LEDs with rectangular current pulses with non-zero rise and fall times (or trapezoidal current pulses), although it would result in driving the LEDs with pulses in a different on- and off-time shapes than that of the trapezoidal voltage pulses, did not result in either increment or reduction of the magnitude of the stimulation artifact. We further confirmed that the shape of the current pulses during the pulse on- and off-periods, while it affects the shape of the stimulation artifact, do not affect the magnitude of the stimulation artifact (Supplementary Figure 7).

## Methods

### Micro-LED optoelectrode fabrication and device assembly

Micro-LED optoelectrodes were fabricated using microfabrication techniques that are used for fabrication of planar silicon neural probes, also known as Michigan Probes. Simplified device fabrication flow is shown on Fig. 10.

4" silicon wafers with different substrate boron doping densities ( $N_A \approx 4 \times 10^{12}$ ,  $5 \times 10^{16}$ , and  $1 \times 10^{20} \text{ cm}^{-3}$ , respectively), which have GaN/InGaN multi-quantum-well (MQW) LED layers epitaxially grown with metal-organic chemical vapor deposition (MOCVD) on top, were purchased from Enkris Semiconductors (Suzhou, China). Non-shielded  $\mu$ LED optoelectrodes were fabricated using LED wafers with lightly-boron-doped silicon substrate (p<sup>-</sup> silicon substrate, boron doping density of  $\sim 5 \times 10^{16} \text{ cm}^{-3}$ ), and the shielded  $\mu$ LED optoelectrodes were fabricated using wafers with all three different boron doping densities.

LED structures, including LED mesas, p- and n-GaN contacts and metallic interconnects, were first formed on the wafer. For the  $\mu$ LED optoelectrodes with shielding layer, additional metal layers were formed by repeatedly passivating the surface of the LED and depositing patterned metal layers. Consecutively, neural signal recording electrodes were formed by passivating the top metal layer and depositing electrode material. Finally, the fabricated  $\mu$ LED optoelectrodes were thinned and released from the silicon wafer by double-sided plasma dicing process.

Released  $\mu$ LED optoelectrodes were assembled on printed circuit boards (PCBs) that provide connections to neuronal signal recording IC and LED driver. Four-layer PCBs, on which the traces for the recorded neuronal signals and the LED driving signals are separated by two ground-connected internal layers, were used. The optoelectrodes were mounted on printed circuit boards and were electrically connected to the PCBs by wirebonding contact pads on the backend of the optoelectrode to the gold pads on the PCBs. After potting the exposed wires with epoxy (EPO-TEK 353ND and 353NDT, Epoxy Technology, Billerica, MA), connectors (Omnetics Connector Corp., Minneapolis, MN) as well as the ground and the reference wires were soldered to the PCBs to finalize assembly process.

### **Characterization of electrical and optical properties of $\mu$ LEDs**

The electrical and optical characteristics of each  $\mu$ LED on the electrodes were characterized before *in vitro* and *in vivo* characterization of stimulation artifact. Both current-voltage (I vs.V) and the irradiance-voltage ( $E_e$  vs. V) characteristics were measured for each  $\mu$ LED. First, an optical measurement system consisting of an integrating sphere (FOIS-1, Ocean Optics, Largo, FL) and a spectrometer (Flame, Ocean Optics) were built. A sourcemeter (Keithley 2400, Keithley Instruments, Cleveland, OH) was then connected across the anode and the cathode pins of an  $\mu$ LED on the connector. The tips of the optoelectrode were lowered so that the whole shanks are inside the integrating sphere, ensuring that all the light generated from the  $\mu$ LED can be collected. The DC voltage across the LED anode and the



cathode terminals were swept from 0 V to 4 V, and the resulting current and the spectral flux of the  $\mu$ LED was measured. The radiant flux was calculated by integrating the spectral flux over wavelengths from 350 nm to 600 nm, and the irradiance on the surface of the  $\mu$ LED was then calculated by dividing the radiant flux by the area of the  $\mu$ LED's active region ( $230 \mu\text{m}^2$ ).

### **Setup for *in vitro* characterization of LED-driving-induced artifact**

All *in vitro* characterization were conducted in 1 × phosphate buffered saline (PBS) solution (prepared using 10 × PSB purchased from MP Biomedicals, Solon, OH). A small amount of PBS (approximately 100 mL of 1 × PBS solution) was poured into a small clear polystyrene container (530C-CRY, AMAC Plastic Products, Petaluma, CA). The  $\mu$ LED optoelectrode was lowered into the PBS solution until the bottom halves of the shanks ( $\sim 2.5$  mm) were submerged into the PBS. The exposed stainless steel tips at the loose ends of the ground and the reference wires were also submerged into the PBS.

A neuronal signal recording system (RHD2000, Intan Technologies), in combination with a miniature neural signal amplifier headstage PCB (RHD2132, Intan Technologies, Los Angeles, CA), recorded the stimulation artifact signal at 20 kHz sampling rate, while a function generator (33220A, Keysight Technologies, Santa Rosa, CA) provided voltage pulses for LED driving. 50-ms long (5 Hz frequency, resulting in 25 % duty ratio) rectangular voltage pulses were used as the LED driving signal. The off-time (low-level) voltage, on-time (high-level) voltage, pulse rise time, and pulse fall time were varied for different experiments. The experimental conditions used for each type of experiment are summarized in Supplementary Table 1. Before the LED driving signal was provided, the impedance (both the magnitude and the phase at 1 kHz) of each recording electrode on the  $\mu$ LED optoelectrode was measured using the Intan amplifier.

### **Characterization of the effect of the shielding layer on the magnitude of *in vitro* LED-driving-induced artifact**

Two non-shielded  $\mu$ LED optoelectrodes and two shielded  $\mu$ LED optoelectrodes, all of which are fabricated using the LED wafer with  $p^-$  silicon substrate, were used. First, the high-level voltages required for generation of optical flux equivalent to 1 - 50  $\text{mW mm}^{-2}$  irradiance were calculated. The high-level voltage of the LED driving pulse signal was varied according to the target irradiance, while the low-level voltage was fixed as 0 V and the rise time (as well as the fall time) was fixed as 5 ns (10 – 90 %, equivalent to 6.25 ns of 0 – 100 % rise and fall times).

### **Characterization of the effect of the boron doping of the silicon substrate on the magnitude of *in vitro* LED-driving-induced artifact**

Six shielded  $\mu$ LED optoelectrodes fabricated using LED wafers with FZ,  $p^-$ , and  $p^+$  silicon substrate (two optoelectrodes from each wafer) were used. LED driving signals identical to those used for characterization of the effect of the shielding layer were used.

### **Characterization of the effect of the pulse slew rate on the magnitude of *in vitro* LED-driving-induced artifact**

Two shielded  $\mu$ LED optoelectrodes fabricated using the LED wafer with  $p^+$  silicon substrate were used. The low-level voltage and the rise time of the LED driving pulse signal were varied, while the high-level voltage was fixed as 3.5 V. The low-level voltages of 0 V and 2.8 V were used, and the rise and fall times (10 – 90 %) between 5 ns and 1 ms were used.

### **Recording of *in vitro* LED-driving-induced artifact and data processing**

For each experimental condition for each  $\mu$ LED, signals from the input channels of the neural signal amplifier IC were recorded for 30 seconds, so that artifact signals from longer than 100 pulses can be recorded. Average artifact signal was calculated by first high-pass filtering the signal to remove low-noise fluctuations (with filters with 10 Hz and 250 Hz cutoff frequencies for wideband signal and high-pass filtered signals, respectively) and calculating the average of the fifty 200-ms long segments in the middle of the 30 second period after the first 5 s of the recorded signal. Transient artifact magnitude was calculated from the difference between the maximum and the minimum values of high-pass filtered signal during the first 5-ms period from the point when the voltage changed from the off-level voltage. The mean transient artifact magnitude was calculated by averaging the values from electrode whose impedance magnitudes are between 500 k $\Omega$  and 2 M $\Omega$  and the phases are between -80  $^\circ$  and -55  $^\circ$  at 1 kHz. Two  $\mu$ LED optoelectrodes from each cohort was used, and at least 21 electrodes per optoelectrode (out of 32 total, 25.83 in average) contributed to calculation of the mean artifact magnitude. The mean 1 kHz magnitude and phase of the electrode impedance of the electrodes which contributed to calculation of the mean artifact magnitude were  $1.09 \pm 0.09$  M $\Omega$  and  $-68.2 \pm 4.9$   $^\circ$  (mean  $\pm$  SD).

### ***In vivo* characterization and demonstrations of stimulation-artifact-free optoEphys**

The animal procedures were approved by the Institutional Animal Care and Use Committee of the University of Michigan (protocol number PRO-7275). One male C57BL/6J mouse (32 g) was used for *in vivo* characterization. The mouse was kept on a regular 12h - 12h light - dark cycle and housed in pairs before surgery. No prior experimentation had been performed on this animal. Atropine (0.05mg/kg, s.c.) was administered after isoflurane anesthesia induction to reduce saliva production. The body temperature was monitored and kept constant at 36 - 37 $^\circ$ C with a DC temperature controller (TCAT-LV; Physitemp, Clifton, NJ, USA). Stages of anesthesia were maintained by confirming the lack of nociceptive reflex. Skin of the head was shaved and the surface of the skull was cleaned by hydrogen

peroxide (2 %). A 1-mm diameter craniotomy was drilled at 1.5 mm posterior from bregma and 2 mm lateral of the midline. The dura was removed over the dorsal CA1 region of the hippocampus and the mouse was injected with AAV5, CaMKII promoter driven ChR2 (AAV5-CaMKIIa-hChR2(H134R)-EYFP), resulting in expression of ChR2 in pyramidal neurons. Viruses were purchased from the University of North Carolina Vector Core (UNC-REF). After the surgery, the craniotomy was sealed with Kwik-Sil (World Precision Instruments, Sarasota, FL) until the day of recording.

On the day of recording, the mouse was anesthetized with isoflurane, the craniotomy was cleaned, and a shielded  $\mu$ LED optoelectrode with  $p^+$  silicon substrate was lowered to the CA1 region of the hippocampus. Baseline recording was performed (30 min), after which simultaneous recording and stimulation were done using three  $\mu$ LEDs from one shank (as described in Results in more details). 0.46  $\mu$ W power, equivalent to 2 mW mm<sup>-2</sup> irradiance at the surface of each  $\mu$ LED, was used to characterize the light induced artifact *in vivo* and to alter the activity of neurons (more details are provided in Results). For characterization of stimulation artifact and confirmation of optical induction of neuronal activities, pulsed optical stimulation (100-ms long, 2 Hz, 100 pulses) was generated from each  $\mu$ LED. The (10 - 90 %) rise and the fall times of each voltage pulse were set as 1 ms. After collecting sufficient data using optical stimulation from each  $\mu$ LED, a 500-ms long optical stimulation sequence involving switching on and off all the three  $\mu$ LEDs on the shank (whose details are provided in Results) were repeated 100 times. RHD2000 recording system with RHD2132 miniature neural signal amplifier headstage was used for acquisition of data from all the recording electrodes ( $n = 32$ , 20 kS/s sampling rate). Keysight 33220A function generator provided voltage pulses for LED driving.

A custom MATLAB (MathWorks, USA) script was used to calculate average stimulation artifact. The wideband traces were first high-pass filtered with a first-order filter with 250 Hz cutoff frequency to remove low-noise fluctuations. The average artifact signal from each recording channel was then obtained by averaging the middle 500-ms long segments (90 total segments out of 100).

The recorded data were then further analyzed for identification and clustering of action potentials. No manipulation in data (e.g. trimming of 1-ms long segments before and after the beginning and the ending of each pulsed optical stimulation) other than high-pass filtering (at 500 Hz) of the baseband signal was conducted. Spikes were first detected and automatically sorted using the Kilosort algorithm [Pachitariu 2016] and then manually curated using Phy to get well-isolated single units (multi-unit and noise clusters were discarded). To measure the effect of LED stimulation on neuronal activity, peristimulus time histograms (PSTHs) were built around stimulus onset (spike trains were binned into 10-ms bins). Baseline and light-induced firing rate were calculated for each single unit, in which the baseline was defined as light-free epochs (400 ms) between trials and the stimulation period as the light-on (100 ms). Wilcoxon-signed rank test was used to compare the mean firing rate per trial (n = 100 trials) during baseline and LED stimulation.

## Figures

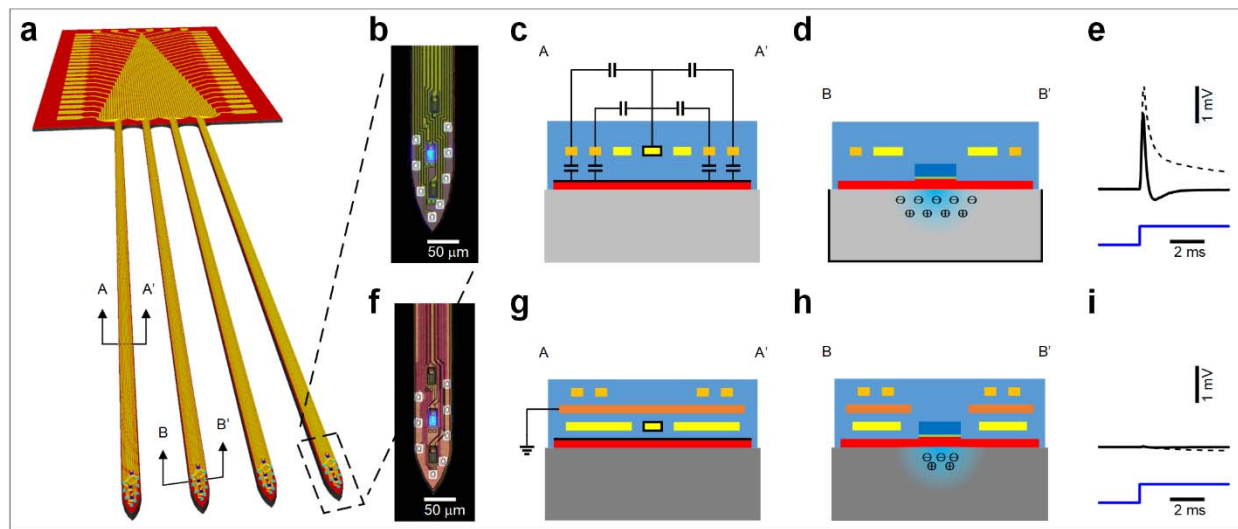

**Figure 1: Micro-LED optoelectrode, sources of stimulation artifact, and schemes for reduction of**

**stimulation artifact.** (a) Schematic illustration of a (1<sup>st</sup>-generation)  $\mu$ LED optoelectrode. (b)

Microphotograph of a tip of the 1st-generation  $\mu$ LED optoelectrode. Eight recording electrodes, three  $\mu$ LEDs, and interconnection lines that connect the electrodes and the  $\mu$ LEDs to the optoelectrode backend are shown. (c) Cross-sectional schematic diagram of a shank of the first-generation  $\mu$ LED

optoelectrode, showing sources of the electromagnetic interference (EMI) in black bold lines. (d) Cross-sectional schematic diagram of a tip of the 1st-generation  $\mu$ LED optoelectrode, showing optical generation of carriers and photovoltaic-effect(PV)-induced electrostatic potential at the substrate-electrolyte interface. (e) An example stimulation artifact recorded from a channel of the 1st-generation optoelectrode. Wideband signal is shown in black dashed line, high-pass filtered signal in black solid line, and LED input signal in blue solid line. The high-pass filtered signal has peak-to-peak magnitude of 2.31 mVpp. (f) Microphotograph of a tip of the second-generation  $\mu$ LED optoelectrode on which stimulation artifact reduction schemes are implemented. (g-h) Cross-sectional schematic diagrams of the shank

(part g) and the tip (part h) of the second-generation  $\mu$ LED optoelectrode, showing methods for reduction of stimulation artifact: shielding layer and high-density doping of the substrate, respectively. (i) An example stimulation artifact recorded from a channel of the second-generation optoelectrode.

(i) An example stimulation artifact recorded from a channel of the second-generation optoelectrode.

The color scheme is identical to that of part e. Elimination of stimulation artifact ( $V_{pp} = 31.89 \mu\text{V} < 50 \mu\text{V}$ )

is notable.

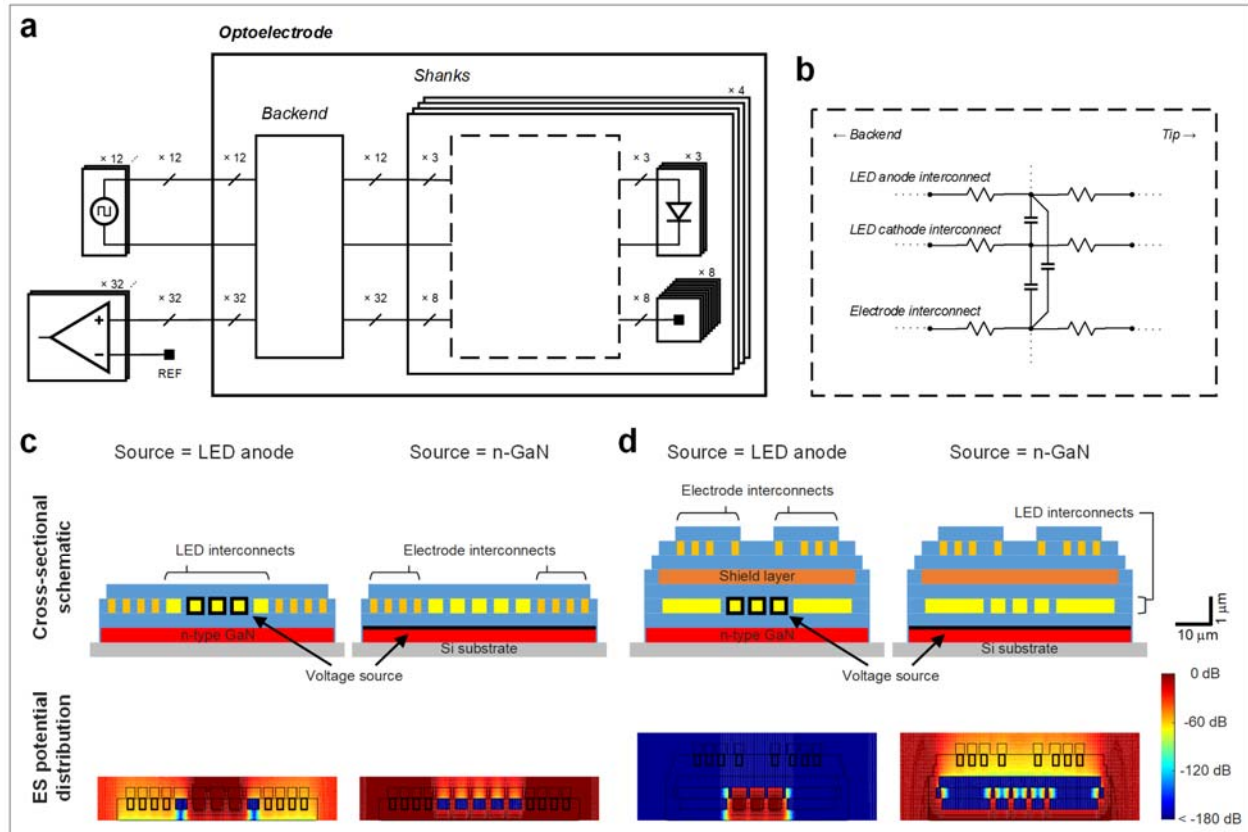

**Figure 2: Generation of electromagnetic interference (EMI)-induced stimulation artifact.** (a) System-level electrical circuit schematic diagram of a  $\mu$ LED optoelectrode, a LED driving system, and a neural signal recording system. Some details, including some resistors representing the line and the contact resistances, are omitted for better visibility. The equivalent circuit of the backend, which is similar to that of the shank shown in part b, is also omitted. (b) Simplified electrical circuit schematic diagram of a shank of the  $\mu$ LED optoelectrode. Only one of each type of interconnect is shown for better visibility, and the inductors were ignored due to their small values. (c) Results of finite-element-method (FEM) simulation of the electrostatic potential distribution inside the non-shielded (1<sup>st</sup>-generation) optoelectrode shank cross-section due to voltage from different EMI sources. In the schematic illustrations of the shank cross-sections of the  $\mu$ LED optoelectrodes, yellow rectangles indicate LED anode and cathode interconnects, gold rectangles recording electrode interconnects, red rectangles LED (n-GaN and In(Ga)N buffer) layer, and grey rectangles silicon substrate. Regions in light blue indicate



silicon dioxide insulators. Sources of EMI are highlighted with bold black lines. Electrostatic potentials of the highlighted regions were set as 1 V, while those of the other parts of the LED driving circuitry were set as 0 V. (d) Results of FEM simulation of the electrostatic potential distribution inside the shielded optoelectrode shank cross-section due to voltage from different EMI sources. The color schemes identical to the one used in part c were used, while an additional color, orange, was used to indicate the shielding layer in the schematic diagram. Great reduction of the electrostatic potential due to inclusion of the additional shielding layer is visible for both the fields originating from the LED anode interconnects and that originating from the n-GaN layer.

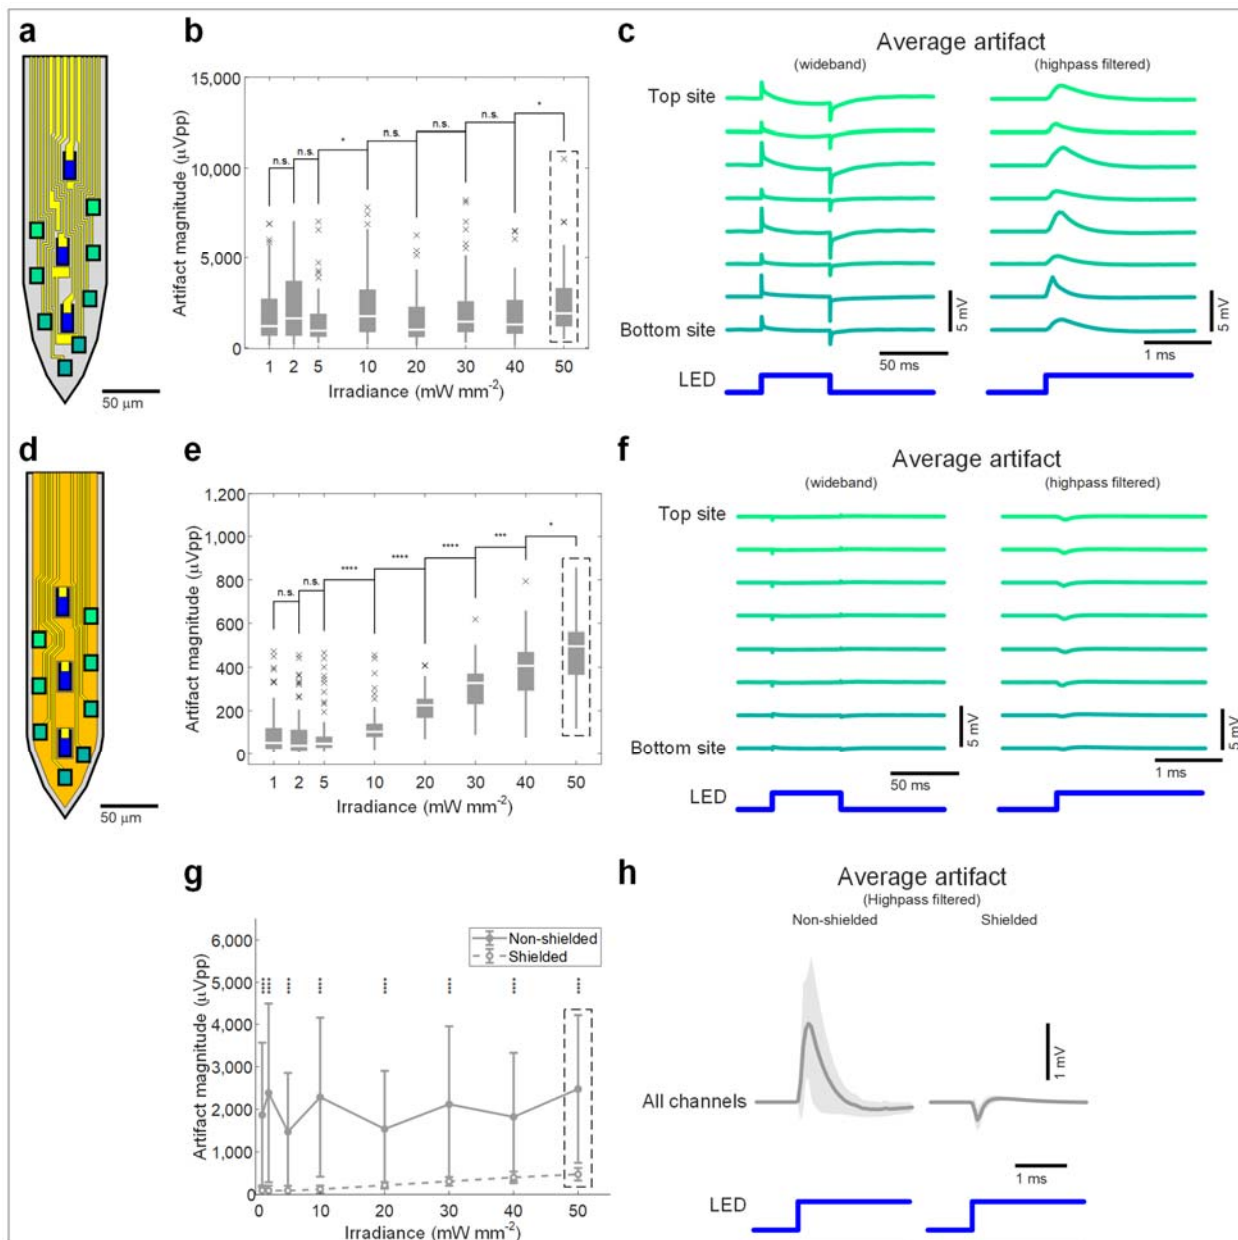

**Figure 3: Reduction of EMI-induced stimulation artifact with inclusion of shielding layer.** (a) Schematic illustration of the tip of a non-shielded (first-generation)  $\mu$ LED optoelectrode. Blue rectangles indicate LEDs and the yellow polygons indicate metal interconnects. Recording electrodes are indicated with rectangles with bold black sides. The face color of each electrode-indicating rectangle corresponds with the line color of the trace indicating the signal recorded from the recording channel corresponding to the same electrode in part c. (b) Peak-to-peak magnitude of the high-pass filtered stimulation artifact

recorded from the channels on the non-shielded  $\mu$ LED optoelectrodes corresponding to the electrodes on the shank on which a  $\mu$ LED was turned on. Boxes indicate interquartile ranges, white lines medians, whiskers non-outlier extreme values, and black x marks outliers. n.s. indicates  $p > 7.14 \times 10^{-2}$ , and \* indicates  $1.42 \times 10^{-3} < p < 7.14 \times 10^{-2}$  (Mann-Whitney U test with Bonferroni correction,  $n = 75$ ). (c) Waveforms of stimulation artifact recorded from the channels that correspond to the electrodes on different locations on the tips of the non-shielded  $\mu$ LED optoelectrodes. LED driving signal with resulting irradiance of  $50 \text{ mW mm}^{-2}$  at the surface of the  $\mu$ LED was used. The blue trace at the bottom indicate the LED signal. Resemblance between the waveform of the stimulation artifact and that of the LED signal suggests strong EMI coupling. (d) Schematic illustration of the tip of a shielded  $\mu$ LED optoelectrode. The color scheme identical to that of part a was used, except for an additional color, gold, to indicate the shielding layer. (e) Peak-to-peak magnitude of the high-pass filtered stimulation artifact recorded from recording channels on the shielded  $\mu$ LED optoelectrodes. n.s. indicates  $p > 7.14 \times 10^{-2}$ , \* indicates  $1.42 \times 10^{-3} < p < 7.14 \times 10^{-2}$ , \*\*\* indicates  $1.42 \times 10^{-5} < p < 1.42 \times 10^{-4}$ , and \*\*\*\* indicates  $p < 1.42 \times 10^{-5}$ . (Mann-Whitney U test with Bonferroni correction,  $n = 67$ ). (f) Waveforms of stimulation artifact recorded on non-shielded  $\mu$ LED optoelectrodes. Change of the polarity of the stimulation artifact with respect to that of the LED stimulation signal, which suggest change in the mechanism of the stimulation artifact generation, is notable. (g) Mean peak-to-peak magnitude of the high-pass filtered stimulation artifact recorded from the channels on the non-shielded  $\mu$ LED optoelectrodes corresponding to the electrodes on the shank on which a  $\mu$ LED was turned on. X coordinates indicate the irradiance at the surface of the  $\mu$ LED, and the error bars indicate one standard deviation. \*\*\*\* indicates  $p < 1 \times 10^{-4}$ . (Mann-Whitney U test). (h) Average high-pass filtered waveforms of stimulation artifact recorded from the channels that correspond to the electrodes on the shank on which a  $\mu$ LED was turned on. LED driving signal with resulting irradiance of  $50 \text{ mW mm}^{-2}$  at the surface of the  $\mu$ LED was used. The shaded regions show one standard deviation away from the mean and the blue traces at the bottom indicate

the LED signal. The mean ( $\pm$  SD) peak-to-peak magnitudes are 2477.75 ( $\pm$  1733.83) for non-shielded  $\mu$ LED optoelectrodes and 474.59 ( $\pm$  146.26) for shielded  $\mu$ LED optoelectrodes.

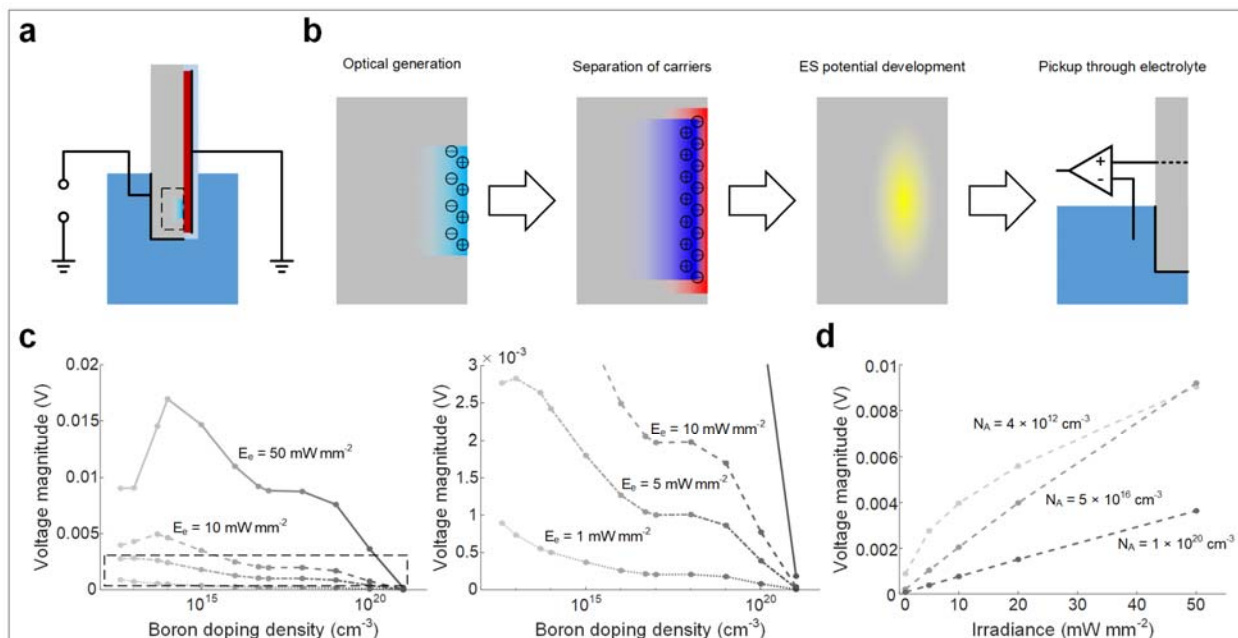

**Figure 4: Generation of photovoltaic-effect(PV)-induced electrostatic potential and consequent**

**stimulation artifact.** (a) Schematic illustration of the cross-section of the 3D model used in the finite-element-method (FEM) device physics simulation. Grey rectangle indicates boron-doped silicon, red rectangle AlN buffer, light blue region silicon dioxide insulator. The electrolyte, which the darker light blue region surrounding the bottom half of the  $\mu$ LED optoelectrode indicates, was not included in the model but was taken into account by applying a boundary condition to the electrode at the interface. Bold black lines indicate the electrodes in the model and their boundary conditions. (b) Schematic

illustrations of the processes through which electrostatic potential is induced and PV-induced stimulation artifact is generated. The first three panels are the magnified views of the region inside the rectangle with the black dashed sides on part a. Circles with plus signs indicate holes, circles with minus signs electrons, shading in light blue optical generation, shading in blue distribution of holes, shading in red distribution of electrons, and shading in yellow electrostatic potential. In the steady state, all the processes occur simultaneously and in turn maintains a steady distribution of the electrostatic potential inside the substrate. (c) Steady-state voltage of the electrode representing the substrate-electrolyte interface, calculated at different doping densities and light intensities. The right panel shows the

magnified view of the region inside the rectangle with black dashed sides on the left panel. (d) Steady-state substrate-electrolyte interface voltage of substrates with a few selected boron doping densities at different light intensities. The voltage from heavily boron-doped silicon substrate stays low even at higher irradiance, whereas that from intermediately boron doped silicon substrate increases and exceeds that from very lightly doped silicon substrate, suggesting great reduction of the PV-induced stimulation artifact with higher boron doping.

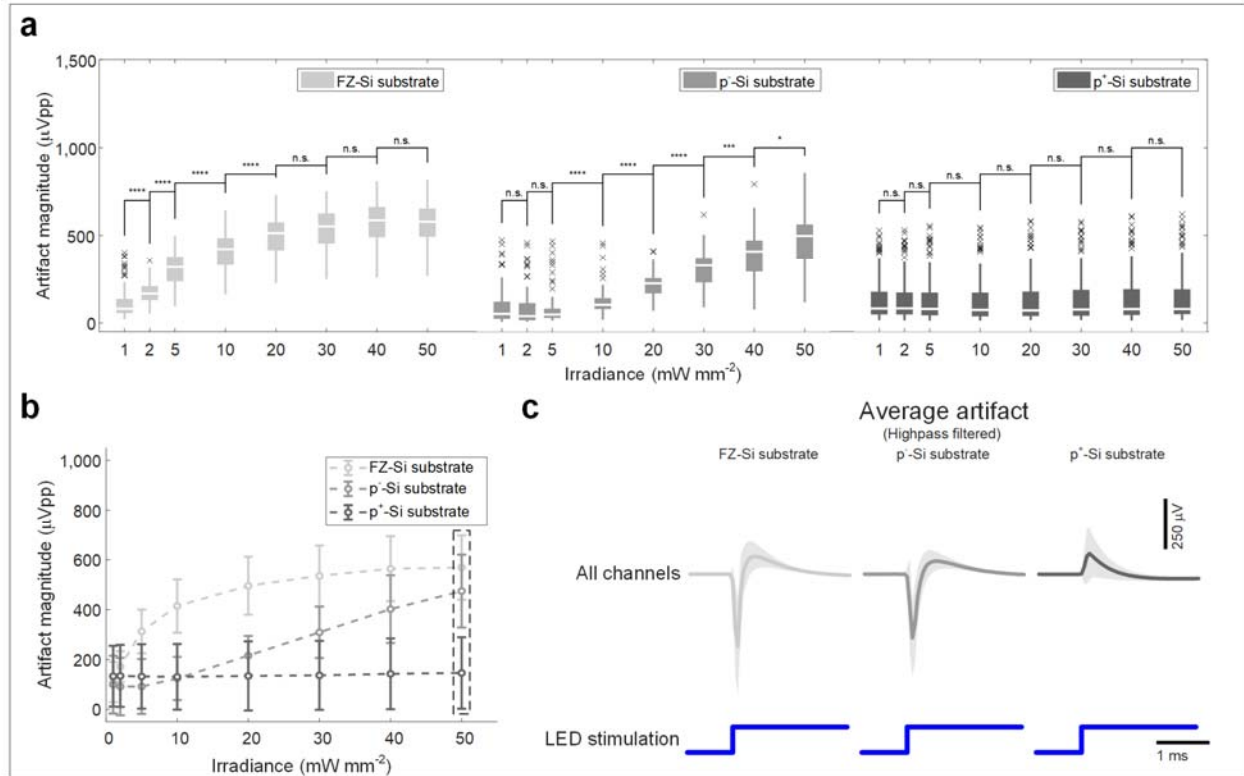

**Figure 5: Reduction of PV-induced stimulation artifact with heavy boron doping of silicon substrate.**

(a) Peak-to-peak magnitude of the high-pass filtered stimulation artifact recorded from recording channels on the shielded  $\mu\text{LED}$  optoelectrodes corresponding to the electrodes on the shank on which a  $\mu\text{LED}$  was turned on. n.s. indicates  $p > 7.14 \times 10^{-2}$ , \* indicates  $1.42 \times 10^{-3} < p < 7.14 \times 10^{-2}$ , \*\*\* indicates  $1.42 \times 10^{-5} < p < 1.42 \times 10^{-4}$ , and \*\*\*\* indicates  $p < 1.42 \times 10^{-5}$  (Mann-Whitney U test with Bonferroni correction,  $n = 124, 67,$  and  $151$  for devices with FZ-Si substrate, p<sup>-</sup>-Si substrate, and p<sup>+</sup>-Si substrate, respectively). (b) Mean peak-to-peak magnitude of the high-pass filtered stimulation artifact whose distribution is shown in part a. X coordinates indicate the irradiance at the surface of the  $\mu\text{LED}$ , and the error bars indicate one standard deviation. The trends in change in the magnitude of the stimulation artifact are similar to those shown in Fig. 4d. (c) Average high-pass filtered waveforms whose mean peak-to-peak magnitudes are shown in part b, inside the rectangle with black dashed sides. LED driving signal with resulting irradiance of  $50 \text{ mW mm}^{-2}$  at the surface of the  $\mu\text{LED}$  was used. The shaded regions show one standard deviation away from the mean and the blue traces at the bottom indicate the LED

signal. The mean ( $\pm$  SD) peak-to-peak magnitudes are 569.33 ( $\pm$  129.00), 474.59 ( $\pm$  146.26), and 146.05 ( $\pm$  143.40)  $\mu$ Vpp for devices with FZ-Si substrate (n = 124), p<sup>-</sup>-Si substrate (n = 67), and p<sup>+</sup>-Si substrate (n = 151), respectively. The polarity of sharp transient component is inverted on the shielded  $\mu$ LED optoelectrode fabricated using the wafer with heavily boron-doped silicon substrate.



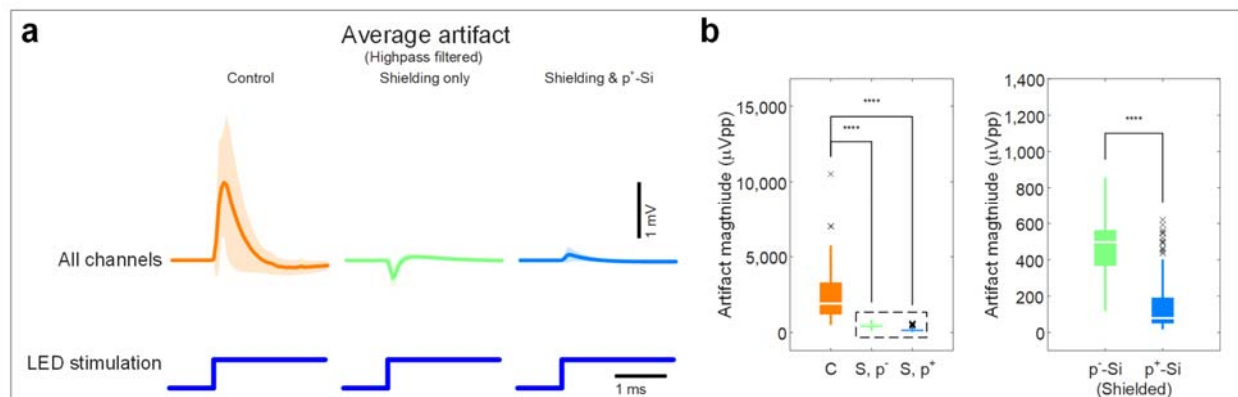

**Figure 6. Reduction of stimulation artifact with structural modifications.** (a) Average high-pass filtered waveforms of stimulation artifact recorded from the channels on  $\mu$ LED optoelectrodes with different configurations. Each average was calculated using only the signals recorded from the channels that correspond to the electrodes on the shank on which a  $\mu$ LED was turned on. LED driving signal with resulting irradiance of  $50 \text{ mW mm}^{-2}$  at the surface of the  $\mu$ LED was used. The shaded regions show one standard deviation away from the mean and the blue traces at the bottom indicate the LED signal. (b) Peak-to-peak magnitudes of the signals whose averages are plotted in part a. The right panel shows the magnified view of the region inside the rectangle with black dashed sides on the left panel. Boxes indicate interquartile ranges, white lines medians, whiskers non-outlier extreme values, and black x marks outliers. \*\*\*\* indicates  $p < 3.33 \times 10^{-5}$  (Mann-Whitney U test with Bonferroni correction,  $n = 75$ , 67, and 151 for control device, device with shielding layer without substrate doping modification, and device with shielding layer with high-density boron doping of the silicon substrate, respectively). The mean ( $\pm$  SD) peak-to-peak magnitudes are  $2477.75 (\pm 1733.83)$ ,  $474.59 (\pm 146.26)$ , and  $146.05 (\pm 143.40)$   $\mu\text{Vpp}$  for the control device, the device with shielding layer without substrate doping modification, and the device with shielding layer with high-density boron doping of the silicon substrate, respectively. The average reduction of the magnitude of the stimulation artifact is 5.22-fold with shielding layer only and 16.97-fold with shielding layer and high-density substrate doping combined.

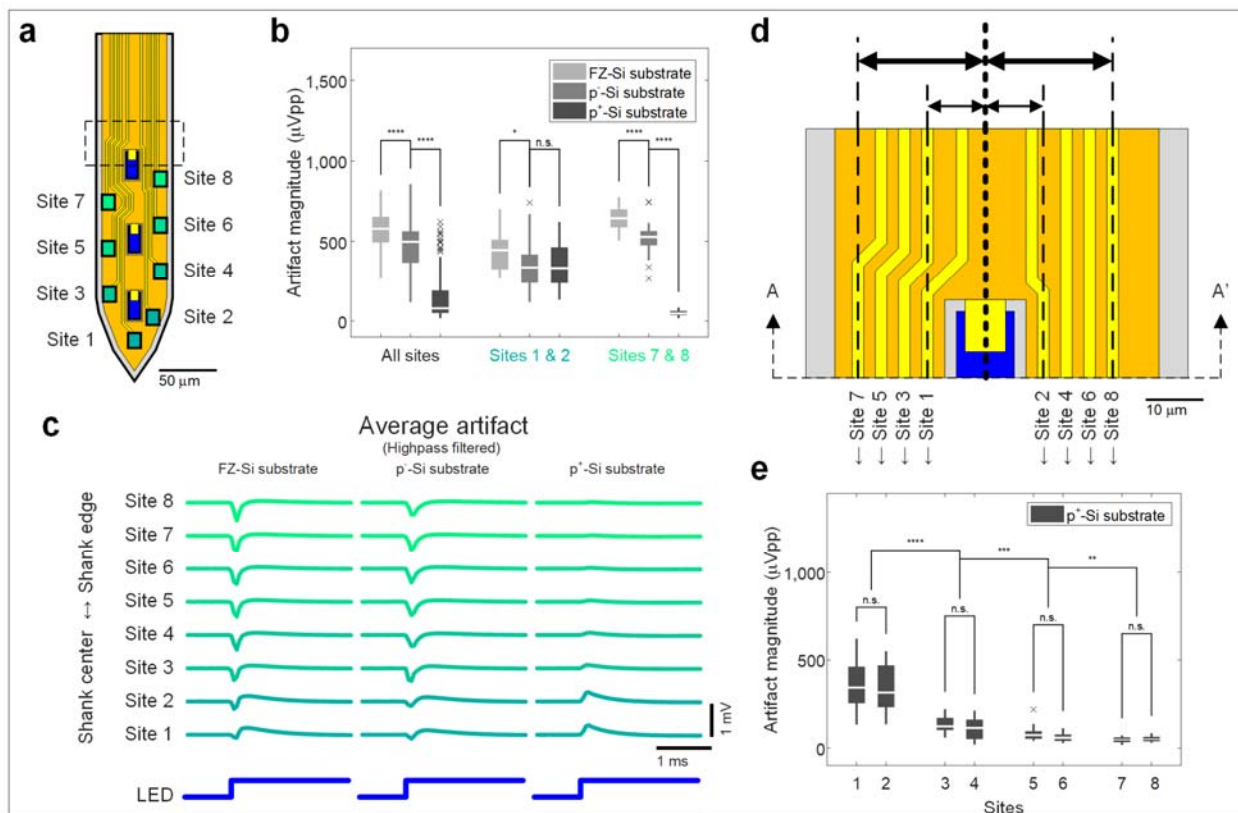

**Figure 7: Residual EMI-induced stimulation artifact.** (a) Schematic illustration of the tip of a shielded  $\mu$ LED optoelectrode. The color scheme is identical to that of Fig. 3d. (b) Peak-to-peak magnitudes of the high-pass filtered stimulation artifact recorded from the channels on the shielded  $\mu$ LED optoelectrodes corresponding to the electrodes on the shank on which a  $\mu$ LED was turned on. LED driving signal with resulting irradiance of  $50 \text{ mW mm}^{-2}$  at the surface of the  $\mu$ LED was used. Boxes indicate interquartile ranges, white lines medians, whiskers non-outlier extreme values, and black x marks outliers. n.s. indicates  $p > 2.5 \times 10^{-2}$ , \* indicates  $5 \times 10^{-3} < p < 2.5 \times 10^{-2}$ , and \*\*\*\* indicates  $p < 5 \times 10^{-5}$  (Mann-Whitney U test with Bonferroni correction,  $n = 124, 67, 151, 34, 19, 38, 32, 22$ , and 41 for each category from left to right). Significant reduction of the magnitude of stimulation artifact recorded from sites 7 and 8 on the  $\mu$ LED optoelectrode with  $p^+$  silicon substrate is notable. (c) Waveforms of average stimulation artifact recorded from the channels that correspond to the electrodes on different locations on the tips of the shielded  $\mu$ LED optoelectrode. LED driving signal with resulting irradiance of  $50 \text{ mW}$

mm<sup>-2</sup> at the surface of the  $\mu$ LED was used. The color scheme is identical to that of Fig. 3f. Elimination of transient component in the stimulation artifact recorded from sites 7 and 8 on the  $\mu$ LED optoelectrode with p<sup>+</sup> silicon substrate is notable. (d) Magnified view of the region inside the rectangle with the black dashed sides on part a. The distance between the center of the interconnect and the center of a  $\mu$ LED, which is exposed through an optical window on the shielding layer, is shown for a few selected recording electrode interconnects. (e) Peak-to-peak magnitudes of the high-pass filtered stimulation artifact recorded from different channels on the shielded  $\mu$ LED optoelectrodes corresponding to the electrodes on the shank on which a  $\mu$ LED was turned on. LED driving signal with resulting irradiance of 50 mW mm<sup>-2</sup> at the surface of the  $\mu$ LED was used. n.s. indicates  $p > 0.05$  (Mann-Whitney U test,  $n = 22, 16, 12, 22, 20, 18, 22,$  and  $19$  for each category from left to right). \*\* indicates  $3.33 \times 10^{-4} < p < 3.33 \times 10^{-3}$ , \*\*\* indicates  $3.33 \times 10^{-5} < p < 3.33 \times 10^{-4}$ , and \*\*\*\* indicates  $p < 3.33 \times 10^{-5}$  (Mann-Whitney U test with Bonferroni correction,  $n = 38, 44, 38,$  and  $41$  for each category from left to right). While the magnitude of the transient component of the stimulation artifact whose polarity is negative (v-shaped) does not change as the function of the distance between the  $\mu$ LED and the interconnect, the magnitude of the component whose polarity is positive (^-shaped) decreases as the distance increases. The distance dependent of the artifact magnitude suggests that the source of the residual artifact on the shielded  $\mu$ LED optoelectrode fabricated using heavily-boron-doped silicon wafer is EMI originating from the  $\mu$ LED exposed through the optical window.

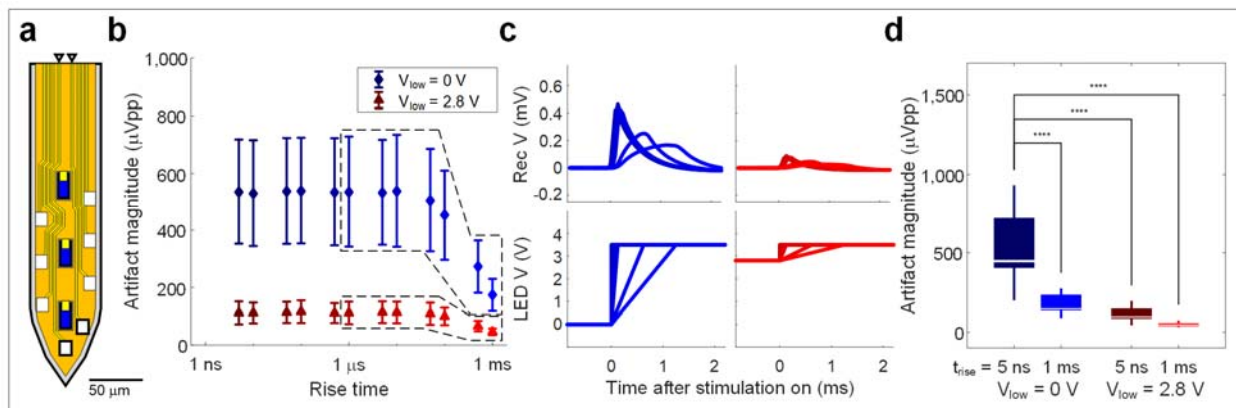

**Figure 8: Reduction of residual EMI-induced stimulation artifact with slew rate modification. (a)**

Schematic illustration of the tip of a shielded  $\mu$ LED optoelectrode with heavily boron-doped silicon substrate. The locations of the electrodes and the interconnects from which the signals were recorded are indicated with rectangles with bold black sides and black arrowheads, respectively. (b) Mean peak-to-peak magnitude of the high-pass filtered stimulation artifact recorded from the channels on the  $\mu$ LED optoelectrodes on the shank on which a  $\mu$ LED was turned on. X coordinates indicate the 10 - 90 % rise time of the pulse. Error bars indicate one standard deviation away from the mean (n = 35). (c) Average waveforms of the recorded stimulation artifact, whose means are shown in part a inside the polygon with dashed sides, and the input voltage signals. Stimulation artifact resulting from an input voltage signal is indicated with the same color. (d) Peak-to-peak magnitudes of the high-pass filtered stimulation artifact for a few selected conditions whose means are shown in part a. Boxes indicate interquartile ranges, white lines medians, and whiskers extreme values. \*\*\*\* indicates  $p < 3.33 \times 10^{-4}$ . (Mann-Whitney U test, n = 35). Significant reduction of the magnitude of the stimulation artifact with slew rate modification using rise time modulation (by 3.08-fold in average), modification of the low-level-voltage (by 4.79-fold in average), and both techniques combined (by 11.52-fold in average) is observed.

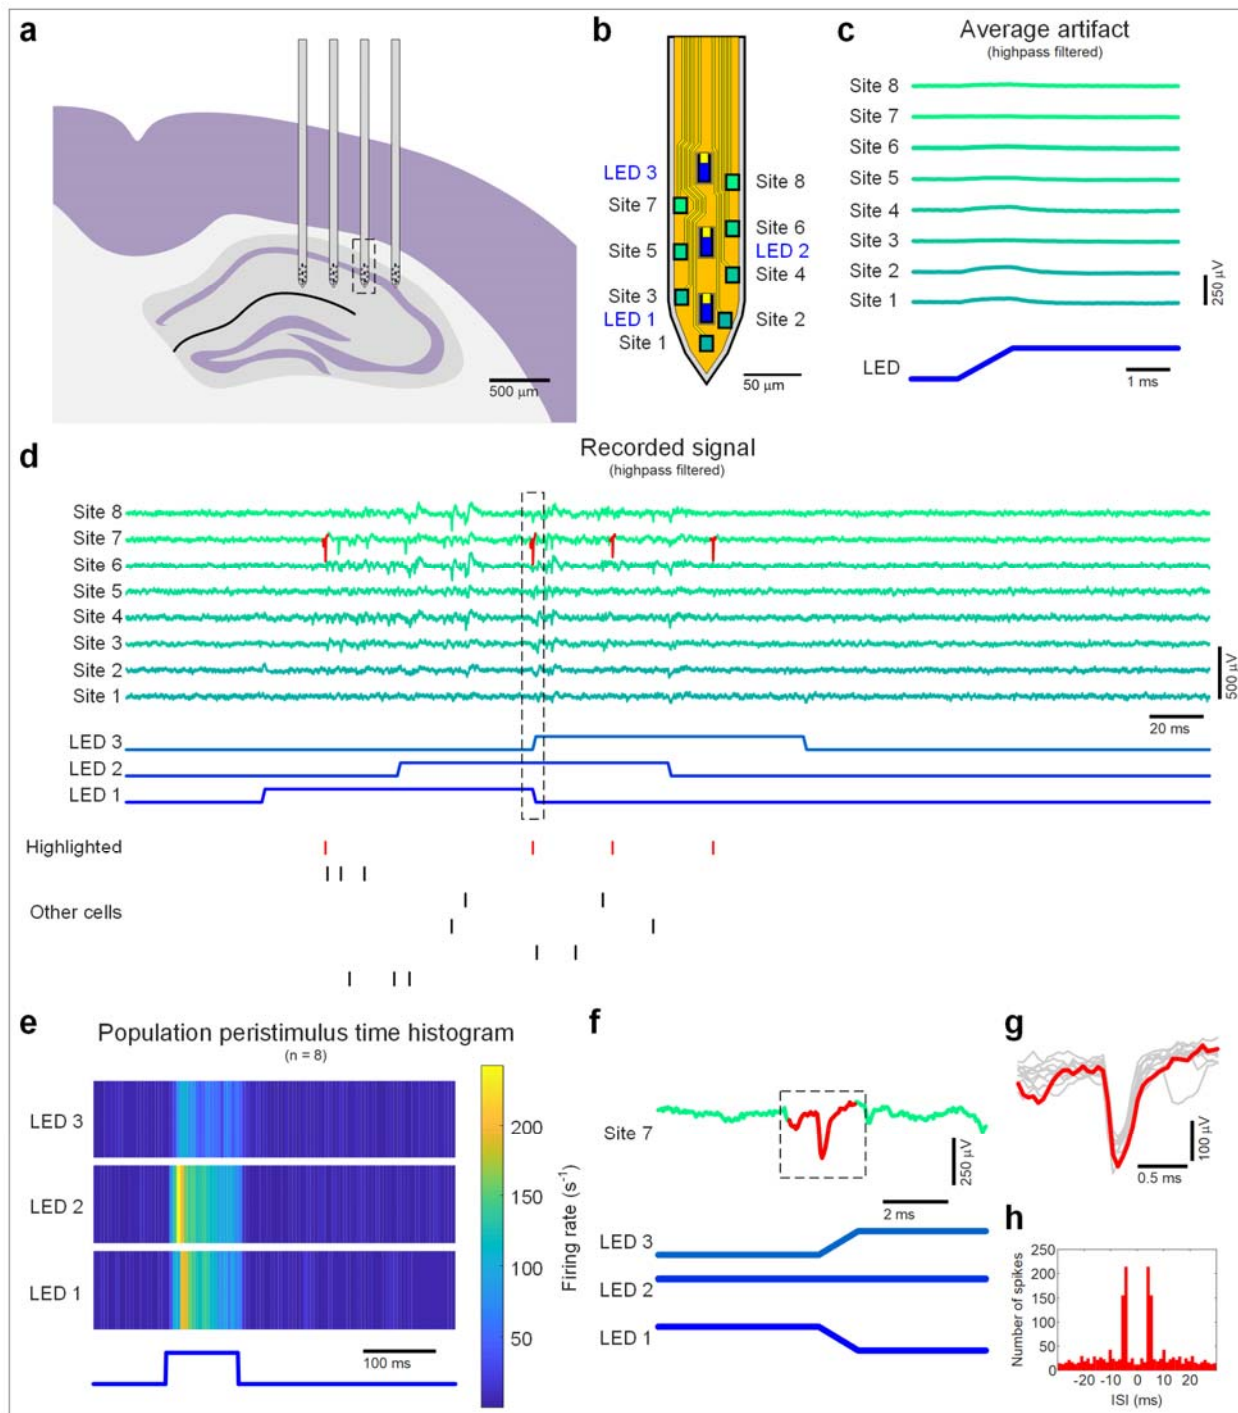

**Figure 9: Demonstration of stimulation-artifact-free *in vivo* opto-electrophysiology.** (a) Schematic illustration of the relative location of the  $\mu$ LED optoelectrode inside the brain. The shank from which the data presented in parts b-h were collected is highlighted with a rectangle with dashed sides. (b) Schematic illustration of the tip of a shielded  $\mu$ LED optoelectrode. The color scheme is identical to that

of Fig. 3d, except for different LED face colors indicating LEDs at different locations. (c) Waveforms of stimulation artifact recorded from the channels that correspond to the electrodes on different locations on the tips of the shielded  $\mu$ LED optoelectrode. Clear elimination of stimulation artifact ( $V_{pp} < 50 \mu V$ ) is shown on all the recording channels. (d) Traces of the recorded signals and the raster plots of the sorted spikes. Strong light-induced activities and lack of stimulation artifact on all the recording channels are shown. The color scheme for the recorded signal traces are identical to that in Fig. 3d. (e) Peristimulus time histograms of the cells that were identified from the recorded signals whose traces are shown in part d. Induced activities are clearly visible during the stimulation on-time. (f) Magnified view of the traces of the signal recorded from Site 7 and the signals provided to the LEDs inside the region highlighted with a rectangle with black dashed line in part d. No distortion of the recorded signal during the short period within which two LEDs were simultaneously toggled is shown. (g) Magnified view of the spike inside the region highlighted with a rectangle with black dashed line in part f, overlaid on top of waveforms of ten spikes from the same unit that were observed before and after spike highlighted in red, showing no distortion of the spike waveform due to stimulation. (h) Autocorrelogram of the spikes of the highlighted cell, exhibiting characteristic firing pattern of pyramidal neurons.

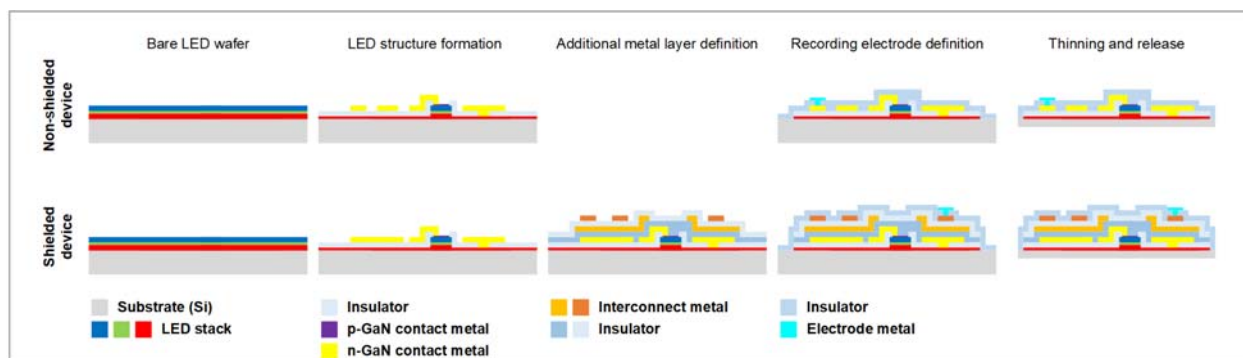

**Figure 10: Micro-LED optoelectrode fabrication process flow.** An imaginary cross-section containing only one LED and one recording electrode are located at is shown for each type of  $\mu$ LED optoelectrode.

## References

- [Henze 2000] D. Henze et al., "Intracellular features predicted ...," J. Neurophys 2000
- [Buzsaki 2004] G. Buzsaki, "Large-scale recording of ...," Nat. Neurosci 2004
- [Boyden 2005] E. Boyden et al., "Millisecond-', Nat. Neurosci 2005
- [Deisseroth 2011] K. Deisseroth et al., "Optogenetics," Nat. Methods 2011
- [Buzsaki 2015] G. Buzsaki et al., "Tools for probing ...," Neuron 2015
- [Wise 1975] K. Wise et al., "A Low-Capacitance ...," IEEE TBME 1975
- [Wise 2008] K. Wise et al., "Microelectrodes, ...," IEEE 2008
- [Royer 2010] S. Royer et al, "Multi-array silicon probes ...," Eur. J. Neurosci. 2010
- [Stark 2012] E. Stark et al., "Diode probes for ...," J. Neurophys 2012
- [Wu 2013] F. Wu et al., "An implantable neural ...," J. Neural Eng. 2013
- [Wu 2015] F. Wu et al., "Monolithically Integrated muLEDs ..." Neuron 2015
- [Kampasi 2016] K. Kampasi et al., "Fiberless multicolor neural ...," Sci. Rep. 2016
- [Schwaerzle 2017] M. Schwaerzle et al., "Compact silicon-based optrode ...," J. Micromech. Microeng.
- [English 2017] D. English et al., "Pyramidal cell-interneuron circuit ...," Neuron 2017
- [Kim 2016] K. Kim et al, "GaN-on-Si ...," IEDM 2016
- [Grosenick 2015] L. Grosenick et al, "Closed-loop and Activity-Guided ...," Neuron 2015
- [Wise 1970] K. Wise et al., "An integrated-circuit approach ...," IEEE TBME 1970
- [Mikulovic 2016] S. Mikulovic et al., "On the photovoltaic ...," Neurophotonics 2016
- [Jun 2017] J. Jun et al., "Fully integrated silicon ...," Nature 2017
- [Kampasi 2018] K. Kampasi et al., "Dual color optogenetic ...," Microsystems & Nanoengineering 2018
- [Ayling 2009] O. Ayling et al., "Automated light-based mapping ...," Nat. Methods 2009
- [Han 2009] X. Han et al., "Millisecond-Timescale optical control ...," Neuron 2009
- [Cardin 2010] J. Cardin et al., "Targeted optogenetic stimulation ...," Nat. Proc. 2010



- [Khuram 2013] A. Khurram et al, "Investigation of the ...," Prof. IEEE EMBS 2013
- [Laxpati 2014] N. Laxpati et al., "Real-time in vivo ...," Frontiers in Neuroengineering 2014
- [Budai 2018] D. Budai et al., "A novel carbon ...," PLoS ONE 2018
- [Kuzum 2014] D. Kuzum et al., "Transparent and flexible ...," Nat. Comm. 2014
- [Park 2016] D. Park et al., "Fabrication and utility ...," Nat. Protocol 2016
- [Scholvin 2016] J. Scholvin et al, "Closed-packed silicon microelectrodes ...," IEEE TBME 2016
- [Pachitariu 2016] M. Pachitariu et al, "Kilosort: ...," bioRxiv 2016
- [Whalen 2005] J. Whalen et al, "Electrochemical Deposition of ...," J. Electrochem. Soc. 2005
- [Desai 2010] S. Desai et al., "Improving impedance of ...," Front. Neuroeng 2010
- [Xiao 2004] Y. Xiao et al., "Electrochemical polymerization and ...," J. Electroanal. Chem. 2004
- [Venkatraman 2011] S. Venkatraman et al., "In vitro and in vivo ...," IEEE TNSRE 2011
- [Boehler 2017] C. Boehler et al., "Long-Term Stable Adhesion for ...," ACS Appl. Mater. Interfaces 2017

## Acknowledgements

The work has been supported by NIH 1-U01-NS090526-01, NSF 1545858, NSF 1707316, NIH 1-R01-MH107396-01, and NIH 1-U01-NS090583-01.

The authors appreciate Hyunsoo Song's help with Sentaurus TCAD simulation.

## Author Information

### Affiliations

Department of Electrical Engineering, University of Michigan, Ann Arbor, Michigan 48105, USA

Kanghwan Kim, Mihály Vöröslakos, John P. Seymour, Kensall D. Wise & Euisik Yoon

Neuroscience Institute, Langone Medical Center, New York University, New York, NY, 10016

Mihály Vöröslakos & György Buzsáki,

### Author contributions

K. K. designed, fabricated, and assembled  $\mu$ LED optoelectrodes; designed and conducted *in vitro* characterizations; designed and participated in *in vivo* experiments; conducted CAD simulations; conducted analyses of stimulation artifact of recorded data both *in vitro* and *in vivo*; prepared figures; and wrote the manuscript with input from the other authors. M. V. conducted *in vivo* experiments and processed recorded neuronal signals. J. P. S., K. D. W., G. B. and E. Y. supervised the project, contributed to design of experiments and editing the manuscript.

### Corresponding author

Correspondence to Euisik Yoon
